# Supplementary material for: Universality vs experience: a cross-cultural pilot study on the consonance effect in music at different altitudes
Source: PeerJ. 2020 Jul 7;8:e9344. doi: 10.7717/peerj.9344 (PMC7350922; doi:10.7717/peerj.9344)
Supplement: Supplemental Information 2 [file peerj-08-9344-s002.xls]

## Sheet: presentation order
N tot	N	Group	Altitude	Gender	Age	Year school	Musician	YearMusic	Music/day (hours)	West Music	WestMus: how much	Foreign languages	Linguages	Handedness	Diss1A	Con3A	Diss2	Diss2A	Diss1	Diss1A	Diss1C	Diss2C	Con3A	Con1A	Con1B	Diss1	Con3B	Diss3A	Diss2C	Diss3C	Diss2B	Diss1B	Diss3A	Con1B	Diss3B	Diss3B	Diss2	Diss3B	Diss3	Con3	Con1C	Con1C	Con1	Con3C	Con2B	Diss2B	Diss3C	Con2	Diss1C
1	1	Ita	Low	F	36	21	Yes	30	2.5	Yes	Often	2	It-Ted-Eng	Right	2	3	3	3	3	3	2	2	3	3	4	3	4	3	2	2	3	3	4	4	3	3	4	3	3	4	4	4	4	4	4	3	2	4	4
2	2	Ita	Low	M	63	18	No		1	Yes	Always	0	It	Right	1	1	2	1	1	3	2	2	2	3	2	2	2	1	1	1	1	1	2	4	3	2	3	2	1	2	2	2	4	3	2	2	2	2	2
3	3	Ita	Low	M	59	13	No		1	Yes	Always	1	It-Fr	Right	2	2	1	2	1	2	1	1	2	3	3	1	2	2	1	1	2	1	2	2	1	1	2	2	2	3	3	3	3	1	2	1	1	2	1
4	4	Ita	Low	M	25	17	No		1	Yes	Always	1	It-Eng	Right	1	1	1	1	2	1	1	1	4	3	3	2	1	1	1	1	1	1	1	3	1	1	2	1	2	2	3	3	4	2	2	1	1	4	1
5	5	Ita	Low	M	32	20	Yes	10	1.5	Yes	Often	2	It-Eng-Esp	Right	2	3	2	2	2	2	1	1	3	4	3	1	2	2	1	1	2	1	2	3	1	1	2	1	2	3	2	3	4	2	3	2	1	3	1
6	6	Ita	Low	M	48	22	No		0.5	Yes	Always	2	It-Eng-Fr	Right	1	1	1	1	1	1	1	1	2	3	1	1	1	1	1	1	1	1	2	2	2	1	2	2	2	3	2	2	3	2	3	2	1	3	1
7	1	Nep	Low	M	26	12	No		2	Yes	Rarely	3	Nep-Hin-Eng-Arab	Right	1	1	1	1	1	1	2	2	1	1	2	1	2	1	3	4	4	4	3	4	3	3	2	3	2	2	3	3	2	3	2	3	4	2	4
8	2	Nep	Low	M	18	10	No		1	No		0	Nep	Right	1	1	2	3	4	3	1	1	2	3	4	2	1	3	1	1	2	4	3	2	1	3	4	1	2	2	1	1	4	2	2	2	1	2	1
9	3	Nep	Low	M	39	0	No		0.25	No		0	Nep	Right	1	1	2	2	3	1	4	4	1	3	1	2	4	1	1	1	2	2	2	1	1	2	4	1	3	3	2	2	4	1	1	2	3	3	2
10	4	Nep	Low	M	40	7	No		3	No		2	Nep-Hin-Eng	Right	3	2	4	1	3	2	1	1	4	3	2	4	1	1	1	1	3	4	4	3	1	1	4	2	4	4	1	1	4	2	1	2	1	4	2
11	5	Nep	Low	M	30	4	Yes	3	1	No		2	Nep-Hin-Eng	Left	1	1	1	1	1	1	2	2	1	1	3	4	3	3	1	1	1	1	2	3	4	4	4	4	4	4	1	1	2	3	4	4	1	1	2
12	6	Nep	Low	M	29	0	No		1	No		1	Nep-Hin	Right	1	2	1	4	3	1	4	3	2	1	2	3	4	3	4	2	1	3	2	3	2	3	4	2	1	1	2	3	1	4	3	2	4	2	4
13	1	Sherpa	High	M	56	7	No		0	No		3	Nep-Tib-Hin-Eng	Right	1	1	1	1	1	1	2	2	2	2	1	1	2	1	2	2	2	2	2	2	2	2	2	2	2	1	2	2	1	2	1	2	1	2	2
14	2	Sherpa	High	M	23	12	Yes	7	4	Yes	Often	3	Nep-Tib-Hin-Eng	Left	2	1	3	2	2	3	1	2	4	4	2	3	2	2	1	1	1	2	3	4	1	1	3	1	2	3	2	1	4	1	2	2	1	4	1
15	3	Sherpa	High	M	25	6	No		0	No		0	Nep	Right	2	3	1	1	4	3	2	3	4	2	3	3	2	1	4	3	4	3	1	2	2	3	4	1	1	2	1	3	1	2	1	2	3	4	4
16	4	Sherpa	High	M	54	0	No		0	No		1	Nep-Tib	Right	1	1	1	1	2	3	1	1	1	2	3	1	4	1	1	1	2	1	2	1	1	1	2	1	2	2	1	1	2	1	1	1	1	1	1
17	5	Sherpa	High	M	27	7	Yes	6	0.5	No		1	Nep-Tib	Right	1	2	2	1	3	2	1	1	4	2	1	4	1	1	1	1	2	2	1	1	1	1	4	1	4	3	2	2	4	1	1	1	1	2	2
18	1	Sherpa	Low	M	37	16	Yes	5-10	6	Yes	Often	3	Nep-Hin-Eng-Tib	Right	2	2	2	2	2	2	1	1	2	3	3	2	2	2	1	1	1	1	1	3	1	1	2	1	3	4	4	4	4	2	1	1	1	3	1
19	2	Sherpa	Low	M	23	12	Yes	5-10	6	Yes	Often	3	Nep-Hin-Eng-Tib	Right	1	2	1	1	1	2	1	2	3	1	3	1	3	2	1	1	1	1	2	3	2	2	2	2	1	3	3	3	4	2	3	2	1	3	1
20	3	Sherpa	Low	M	29	6	No		3	Yes	Often	4	Nep-Tib-Eng-Cin-Hin	Right	4	2	3	1	4	4	3	2	3	4	3	2	3	1	2	3	4	3	1	2	3	3	4	1	2	3	4	4	4	3	2	2	1	3	3
21	4	Sherpa	Low	M	28	12	No		1	No		3	Nep-Hin-Tib-Eng	Right	3	2	4	1	4	1	4	2	1	3	2	1	4	2	3	3	1	2	1	1	1	1	1	1	1	2	1	2	1	4	4	3	1	2	3
22	5	Sherpa	Low	M	26	10	No		4	Yes	Often	3	Nep-Tib-Hin-Eng	Right	1	3	2	2	4	1	1	3	4	3	4	4	3	4	4	4	3	3	4	4	4	3	4	3	4	4	3	4	4	4	4	4	3	4	4
1	1	Ita	High	F	36	21	Yes	30	2.5	Yes	Often		It-Ted-Eng	Right	3	4	3	3	2	3	3	3	4	4	4	3	3	3	2	2	3	3	3	3	3	3	3	3	2	4	4	4	4	3	4	3	3	4	3
2	2	Ita	High	M	63	18	No		1	Yes	Always		It	Right	4	2	2	2	3	2	1	1	2	3	2	4	2	2	2	2	2	2	3	2	2	2	4	4	4	3	2	2	4	3	2	2	2	2	1
3	3	Ita	High	M	59	13	No		1	Yes	Always		It-Fr	Right	2	2	1	1	1	1	1	1	2	3	2	2	1	1	1	1	2	2	2	2	1	1	2	2	2	3	3	3	3	2	2	1	1	3	1
4	4	Ita	High	M	25	17	No		1	Yes	Always		It-Eng	Right	2	3	1	2	1	1	1	1	4	4	2	1	2	3	1	1	2	1	2	4	1	1	2	1	1	3	3	3	4	1	3	1	1	4	1
5	5	Ita	High	M	32	20	Yes	10	1.5	Yes	Often		It-Eng-Esp	Right	2	3	2	2	2	2	1	1	3	4	4	1	2	2	2	1	2	2	3	3	2	2	3	2	2	3	4	4	4	2	3	2	2	3	1
6	6	Ita	High	M	48	22	No		0.5	Yes	Always		It-Eng-Fr	Right	1	2	2	2	2	2	1	1	3	4	4	4	3	4	2	1	1	2	3	2	2	2	3	3	3	4	3	3	4	3	3	3	2	4	1
7	1	Nep	High	M	26	12	No		2	Yes	Rarely		Nep-Hin-Eng-Arab	Right	1	2	4	3	3	3	1	1	4	4	3	4	1	4	1	1	1	1	2	3	2	2	4	1	4	4	1	1	4	1	1	3	1	4	1
8	2	Nep	High	M	18	10	No		1	No			Nep	Right	1	1	2	2	3	3	1	1	4	4	2	3	2	2	1	1	2	3	4	3	2	2	4	2	4	4	1	1	4	1	1	2	1	3	1
9	3	Nep	High	M	39	0	No		0.25	No			Nep	Right	1	3	4	4	3	4	1	1	4	2	2	4	4	3	2	1	4	4	1	2	1	4	4	1	2	2	4	1	4	4	1	4	4	2	4
10	4	Nep	High	M	40	7	No		3	No			Nep-Hin-Eng	Right	3	2	2	3	3	2	1	1	4	4	1	3	2	1	1	1	2	3	4	3	1	1	4	2	4	4	1	1	4	1	1	2	1	3	1
11	5	Nep	High	M	30	4	Yes	3	1	No			Nep-Hin-Eng	Left	1	1	2	3	3	4	4	4	3	3	1	1	2	4	3	2	2	1	4	4	3	3	2	2	1	1	4	4	3	4	4	3	2	1	4
12	6	Nep	High	M	29	0	No		1	No			Nep-Hin	Right	1	1	3	4	2	1	4	4	3	1	1	2	3	4	1	1	2	3	1	4	4	4	2	4	2	1	2	1	3	4	1	2	3	1	2
[truncated: 61 more columns]

## Sheet: mean per condition
N tot	N	Group	Altitude	Gender	Age	Year school	Musician	YearMusic	Music/day (hours)	West Music	WestMus: how much	Foreign languages	Linguages	Handedness	Con1	Con1	Con1	Con1	Con1A	Con1A	Con1A	Con1A	Con1B	Con1B	Con1B	Con1B	Con1C	Con1C	Con1C	Con1C	Con2	Con2	Con2	Con2	Con2A	Con2A	Con2A	Con2A	Con2B	Con2B	Con2B	Con2B	Con2C	Con2C	Con2C	Con2C	Con3	Con3	Con3
1	1	Ita	Low	F	36	21	Yes	30	2.5	Yes	Often	2	It-Ted-Eng	Right	4	4	4	4	3	4	4	4	4	4	4	4	4	4	4	4	4	4	4	4	4	4	4	4	4	4	4	4	4	4	4	4	4	4	4
2	2	Ita	Low	M	63	18	No		1	Yes	Always	0	It	Right	4	3	3	3	3	2	2	2	2	4	1	1	2	2	1	1	2	2	2	3	1	1	1	1	2	1	1	2	1	1	3	1	2	1	3
3	3	Ita	Low	M	59	13	No		1	Yes	Always	1	It-Fr	Right	3	3	3	3	3	3	3	3	3	2	3	2	3	3	2	2	2	3	3	3	2	2	2	3	2	2	2	2	1	1	2	1	3	3	3
4	4	Ita	Low	M	25	17	No		1	Yes	Always	1	It-Eng	Right	4	4	4	4	3	4	4	4	3	3	3	1	3	3	1	1	4	2	3	3	3	1	1	1	2	1	1	3	1	2	3	1	2	3	3
5	5	Ita	Low	M	32	20	Yes	10	1.5	Yes	Often	2	It-Eng-Esp	Right	4	4	4	4	4	4	4	4	3	3	3	4	2	3	2	4	3	3	3	4	3	4	3	3	3	3	3	3	2	3	3	3	3	3	3
6	6	Ita	Low	M	48	22	No		0.5	Yes	Always	2	It-Eng-Fr	Right	3	4	4	4	3	4	4	4	1	2	3	4	2	2	3	4	3	3	4	4	4	3	4	4	3	4	4	4	2	4	4	4	3	4	4
7	1	Nep	Low	M	26	12	No		2	Yes	Rarely	3	Nep-Hin-Eng-Arab	Right	2	2	2	2	1	2	2	4	2	4	4	4	3	3	4	4	2	2	3	2	3	4	3	3	2	4	4	4	4	4	2	4	2	2	3
8	2	Nep	Low	M	18	10	No		1	No		0	Nep	Right	4	4	4	4	3	3	4	2	4	2	1	1	1	1	1	4	2	3	2	1	3	1	2	3	2	1	4	1	2	1	3	4	2	4	1
9	3	Nep	Low	M	39	0	No		0.25	No		0	Nep	Right	4	2	1	1	3	3	1	1	1	1	2	2	2	2	4	1	3	3	4	2	1	2	2	4	1	4	1	4	4	1	4	4	3	2	3
10	4	Nep	Low	M	40	7	No		3	No		2	Nep-Hin-Eng	Right	4	4	4	4	3	4	4	3	2	3	1	2	1	1	1	1	4	2	2	4	2	2	1	2	1	1	1	1	1	1	1	1	4	4	4
11	5	Nep	Low	M	30	4	Yes	3	1	No		2	Nep-Hin-Eng	Left	2	1	4	4	1	2	4	2	3	3	4	1	1	1	1	1	1	1	1	3	3	1	1	1	4	2	1	1	1	1	1	1	4	1	4
12	6	Nep	Low	M	29	0	No		1	No		1	Nep-Hin	Right	1	1	1	2	1	1	1	2	2	3	3	3	2	3	3	2	2	4	1	1	1	2	1	2	3	2	3	2	3	4	3	4	1	1	2
13	1	Sherpa	High	M	56	7	No		0	No		3	Nep-Tib-Hin-Eng	Right	1	1	1	2	2	1	2	2	1	2	2	1	2	2	1	1	2	1	1	2	1	1	1	1	1	1	1	1	1	1	1	1	1	2	1
14	2	Sherpa	High	M	23	12	Yes	7	4	Yes	Often	3	Nep-Tib-Hin-Eng	Left	4	4	4	4	4	1	3	4	2	4	2	1	2	1	1	1	4	3	2	4	2	1	1	1	2	2	1	2	3	1	1	1	3	3	2
15	3	Sherpa	High	M	25	6	No		0	No		0	Nep	Right	1	1	4	3	2	2	2	2	3	2	2	1	1	3	2	1	4	1	1	2	3	1	1	1	1	1	1	2	1	1	1	1	2	1	1
16	4	Sherpa	High	M	54	0	No		0	No		1	Nep-Tib	Right	2	2	2	2	2	2	2	2	3	1	1	1	1	1	1	1	1	2	1	2	1	1	1	1	1	1	1	1	1	1	1	1	2	2	2
17	5	Sherpa	High	M	27	7	Yes	6	0.5	No		1	Nep-Tib	Right	4	4	3	3	2	4	4	4	1	1	1	1	2	2	1	1	2	3	1	3	1	1	1	1	1	1	1	1	1	1	1	1	3	1	1
18	1	Sherpa	Low	M	37	16	Yes	5-10	6	Yes	Often	3	Nep-Hin-Eng-Tib	Right	4	4	4	4	3	4	3	4	3	3	3	4	4	4	3	3	3	3	4	3	3	4	1	4	1	1	1	3	3	2	3	3	4	3	3
19	2	Sherpa	Low	M	23	12	Yes	5-10	6	Yes	Often	3	Nep-Hin-Eng-Tib	Right	4	3	3	3	1	2	3	4	3	3	3	1	3	3	2	2	3	4	2	1	1	1	1	2	3	2	2	2	1	2	3	3	3	2	2
20	3	Sherpa	Low	M	29	6	No		3	Yes	Often	4	Nep-Tib-Eng-Cin-Hin	Right	4	1	4	4	4	4	4	4	3	2	4	1	4	4	3	2	3	2	2	4	1	2	4	4	2	1	3	2	4	3	3	3	3	3	4
21	4	Sherpa	Low	M	28	12	No		1	No		3	Nep-Hin-Tib-Eng	Right	1	1	1	1	3	2	2	2	2	1	2	4	1	2	4	2	2	1	4	1	2	4	4	2	4	4	2	2	4	4	4	4	2	2	1
22	5	Sherpa	Low	M	26	10	No		4	Yes	Often	3	Nep-Tib-Hin-Eng	Right	4	4	4	3	3	4	4	3	4	4	4	4	3	4	4	4	4	4	4	4	4	4	4	4	4	4	3	4	3	2	4	2	4	3	4
1	1	Ita	High	F	36	21	Yes	30	2.5	Yes	Often		It-Ted-Eng	Right	4	4	4	4	4	4	4	4	4	3	3	4	4	4	4	4	4	4	4	4	4	4	4	4	4	4	4	4	4	4	4	4	4	4	4
2	2	Ita	High	M	63	18	No		1	Yes	Always		It	Right	4	4	3	3	3	4	4	3	2	2	1	1	2	2	1	1	2	3	2	4	1	1	1	1	2	1	1	1	1	1	3	1	3	1	2
3	3	Ita	High	M	59	13	No		1	Yes	Always		It-Fr	Right	3	4	3	4	3	3	3	3	2	2	2	2	3	3	2	3	3	4	4	3	2	2	2	3	2	3	2	2	1	1	1	1	3	4	2
4	4	Ita	High	M	25	17	No		1	Yes	Always		It-Eng	Right	4	4	4	4	4	4	4	4	2	4	4	3	3	3	1	1	4	3	3	4	4	4	3	3	3	1	3	4	1	4	3	1	3	1	1
5	5	Ita	High	M	32	20	Yes	10	1.5	Yes	Often		It-Eng-Esp	Right	4	4	4	4	4	4	3	3	4	3	3	4	4	4	3	3	3	4	3	3	3	4	4	4	3	3	3	3	2	3	3	2	3	3	3
6	6	Ita	High	M	48	22	No		0.5	Yes	Always		It-Eng-Fr	Right	4	4	4	4	4	4	3	3	4	2	4	4	3	3	2	3	4	4	4	4	2	4	3	4	3	4	4	3	1	3	2	4	4	4	4
7	1	Nep	High	M	26	12	No		2	Yes	Rarely		Nep-Hin-Eng-Arab	Right	4	4	4	4	4	4	4	4	3	3	4	2	1	1	1	1	4	3	2	4	3	2	2	3	1	2	1	2	2	2	1	2	4	4	1
8	2	Nep	High	M	18	10	No		1	No			Nep	Right	4	4	3	4	4	3	4	4	2	3	2	2	1	1	1	3	3	3	2	4	2	1	1	1	1	1	1	1	1	1	1	1	4	3	4
9	3	Nep	High	M	39	0	No		0.25	No			Nep	Right	4	3	1	3	2	1	3	4	2	2	3	1	4	1	2	3	2	4	4	1	4	3	1	1	1	1	3	2	1	1	1	1	2	2	4
10	4	Nep	High	M	40	7	No		3	No			Nep-Hin-Eng	Right	4	4	4	4	4	4	3	4	1	3	1	2	1	1	1	1	3	4	1	3	1	3	1	1	1	1	1	2	1	1	1	1	4	3	3
11	5	Nep	High	M	30	4	Yes	3	1	No			Nep-Hin-Eng	Left	3	2	1	1	3	1	3	3	1	4	1	4	4	4	4	4	1	1	3	3	2	4	4	4	4	4	1	4	4	4	4	4	1	1	4
12	6	Nep	High	M	29	0	No		1	No			Nep-Hin	Right	3	2	1	2	1	1	2	2	1	4	2	2	2	1	2	1	1	1	3	1	1	1	3	2	1	3	3	1	4	3	3	4	1	3	2
[truncated: 66 more columns]
